# Supplementary material
Source: HighWire-hosted journal article supplement (https://www.jrheum.org/highwire/filestream/29780/field_highwire_adjunct_files/0/151115_Data_Suppl.pdf)
Supplement: 151115_Data_Suppl.pdf [file 151115_Data_Suppl.pdf]

**Supplementary Figure 1.**

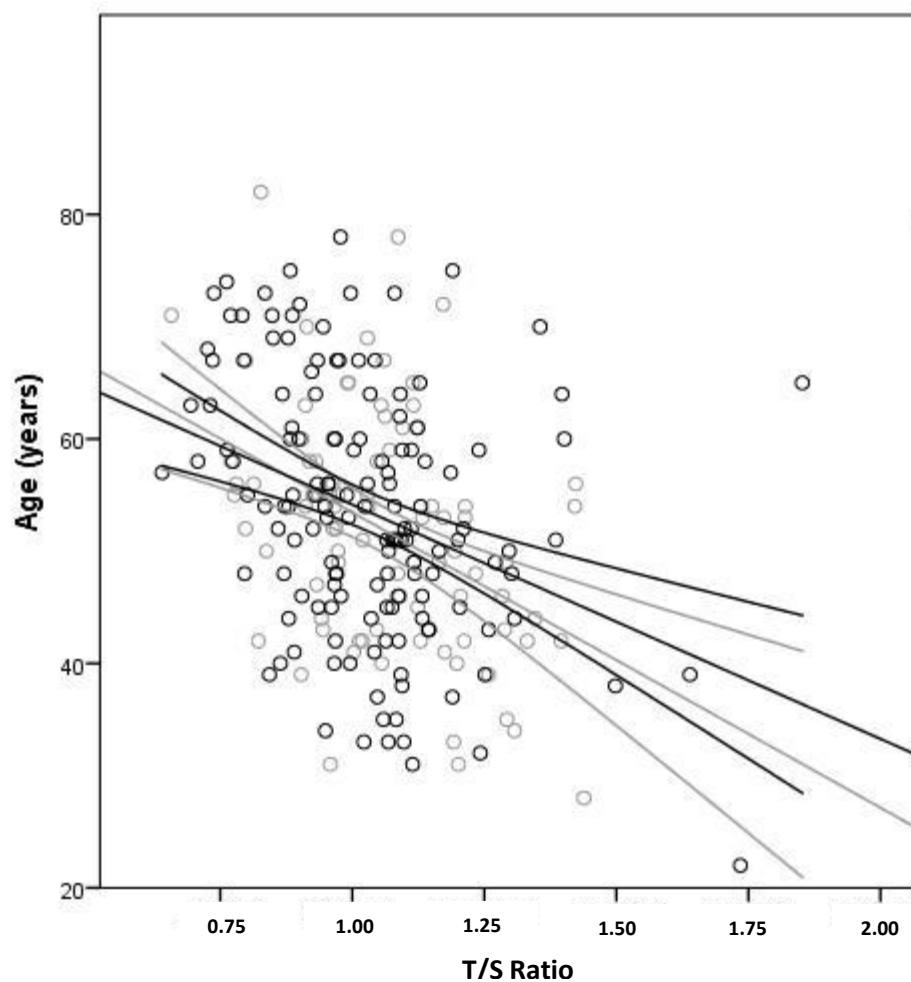

Relationship between age and telomere length in patients with rheumatoid arthritis (RA) and control subjects. Data from patients with RA are presented in black (circles for individual data points, and line for linear regression and 95% CI), and data from control subjects are presented in grey.

**Supplementary Table 1.** Relationship between current medication use and telomere length in patients with rheumatoid arthritis.

|                    | $\beta$ Coefficient (95% CI) | Adjusted P value* |
|--------------------|------------------------------|-------------------|
| Methotrexate       | 0.01 (−0.07, 0.07)           | 0.90              |
| Leflunomide        | 0.01(−0.07, 0.08)            | 0.82              |
| Hydroxychloroquine | 0.01 (−0.06, 0.08)           | 0.76              |
| Anti-TNF agent     | −0.03 (−0.10, 0.04)          | 0.38              |
| Corticosteroids    | 0.01 (−0.05, 0.07)           | 0.82              |
| NSAID              | −0.04 (−0.03, 0.11)          | 0.26              |

\*Adjusted for age, race, and sex. TNF: tumor necrosis factor- $\alpha$ ; NSAID: nonsteroidal antiinflammatory drugs.
